# Supplementary material for: Shear-structured piezoelectric accelerometers based on KNN lead-free ceramics for vibration monitoring
Source: Royal Society of Chemistry journal article supplement (doi:10.1039/d4tc04292a), 2024-01-01
Supplement: d4tc04292a1.pdf [file d4tc04292a1.pdf]

## Supporting Information

### Shear-Structured Piezoelectric Accelerometers based on KNN Lead-Free Ceramics for Vibration Monitoring

Yi Ding<sup>1</sup>, Yu Wang<sup>1</sup>, Wenbin Liu<sup>1</sup>, Yongqi Pan<sup>1</sup>, Ping Yang<sup>3</sup>, Dechao Meng<sup>3\*</sup>, Ting Zheng<sup>1\*</sup> and Jiagang Wu<sup>1,2\*</sup>

1. College of Materials Science and Engineering, Sichuan University; Chengdu, Sichuan, 610064, China.
2. College of Physics, Sichuan University; Chengdu, Sichuan, 610064, China.
3. Microsystem and Terahertz Research Center & Institute of Electronic Engineering, China Academy of Engineering Physics, Chengdu 610200, P. R. China

**\*Corresponding Author: E-mail:** wujiagang0208@163.com (J. G. Wu); zhengtingscu@126.com (T. Zheng); mdechao@163.com (D. C. Meng)

#### Formulas for calculating other parameters:

The mechanical quality factor  $Q_m$  can be calculated using the following formula<sup>[1, 2]</sup>:

$$Q_m = \frac{f_p^2}{2\pi|Z_m|(C_0 + C_1)f_s(f_p^2 - f_s^2)} \quad (1)$$

The corresponding mode is radial expansion mode, where  $f_s=f_r$ ,  $f_p=f_a$ ,  $|Z_m|$  is the impedance corresponding to the resonant frequency, and  $(C_0+C_1)$  is the low-frequency capacitance.

The free dielectric impermeability constants  $\beta_{ii}^T$  can be calculated using the following formula<sup>[1]</sup>:

$$\beta_{ii}^T = 1/\varepsilon_{ii}^T \quad (2)$$

The piezoelectric voltage coefficient  $g_{ij}$  can be calculated using the following formula<sup>[1-3]</sup>:

$$g_{ij} = d_{ij}\beta_{ii}^T \quad (3)$$

Other elastic compliance coefficients and stiffness compliance coefficients can be calculated using the following formula<sup>[1-3]</sup>:

$$s_{11}^D = s_{11}^E(1 - k_{31}^2) \quad (4)$$

$$c_{44}^E = c_{44}^D(1 - k_{15}^2) \quad (5)$$

$$s_{44}^E = 1/c_{44}^E \quad (6)$$

$$s_{44}^D = 1/c_{44}^D \quad (7)$$

$$s_{12}^E = -\sigma^E \cdot s_{11}^E \quad (8)$$

$$s_{12}^D = s_{12}^E - k_{31}^2 \cdot s_{11}^E \quad (9)$$

$$s_{66}^E = s_{66}^D = \frac{1}{c_{66}^E} = \frac{1}{c_{66}^D} = 2(s_{11}^E - s_{12}^E) \quad (10)$$

$$s_{13}^D = -\left\{ \frac{s_{11}^D + s_{12}^D}{2} \cdot \left( s_{33}^D - \frac{1}{c_{33}^D} \right) \right\}^{0.5} \quad (11)$$

$$s_{13}^E = s_{13}^D + d_{33}g_{31} = s_{13}^D + k_{31} \cdot k_{33}(s_{33}^E \cdot s_{11}^E)^{0.5} \quad (12)$$

$$c_{11}^E = \frac{s_{11}^E s_{33}^E - (s_{13}^E)^2}{(s_{11}^E - s_{12}^E)[s_{33}^E(s_{11}^E + s_{12}^E) - 2(s_{13}^E)^2]} \quad (13)$$

$$c_{12}^E = \frac{-s_{12}^E s_{33}^E + (s_{13}^E)^2}{(s_{11}^E - s_{12}^E)[s_{33}^E(s_{11}^E + s_{12}^E) - 2(s_{13}^E)^2]} \quad (14)$$

$$c_{13}^E = \frac{-s_{13}^E}{s_{33}^E(s_{11}^E + s_{12}^E) - 2(s_{13}^E)^2} \quad (15)$$

$$c_{11}^D = c_{11}^E + h_{31}e_{31} \quad (16)$$

$$c_{12}^D = c_{12}^E + h_{31}e_{31} \quad (17)$$

$$c_{13}^D = c_{13}^E + h_{31}e_{33} \quad (18)$$

The piezoelectric stress coefficients  $e_{ij}$ , and piezoelectric stiffness coefficients  $h_{ij}$  can be calculated using the following formula<sup>[1-3]</sup>:

$$e_{31} = d_{31}(c_{11}^E + c_{12}^E) + d_{33}c_{13}^E \quad (19)$$

$$e_{33} = 2d_{31}c_{13}^E + d_{33}c_{33}^E \quad (20)$$

$$e_{15} = d_{15}c_{44}^E \quad (21)$$

$$h_{ij} = e_{ij} \beta_{ii}^S \quad (22)$$

The frequency constant is primarily used to describe the relationship between the resonant frequency and size. The following formulas represent the frequency constants for different vibration modes<sup>[1, 2]</sup>:

- 1) Lateral displacement vibration mode

$$N_1 = f_r \cdot l \quad (23)$$

- 2) Longitudinal vibration mode of a thin rod

$$N_3 = f_r \cdot l \quad (24)$$

- 3) Shear vibration mode

$$N_5 = f_r \cdot t \quad (25)$$

- 4) Planar radial vibration mode

$$N_p = f_r \cdot d \quad (26)$$

- 5) Thickness vibration mode

$$N_t = f_r \cdot t \quad (27)$$

### Supplementary images:

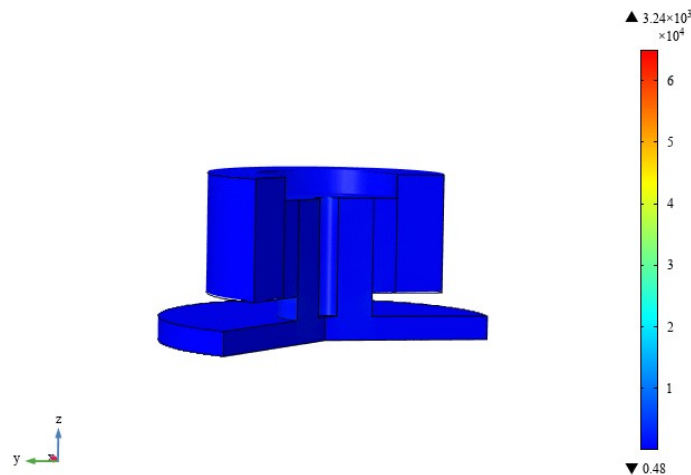

Figure S1. 3D simulated stress distribution map of finite element simulation under different accelerations of 1g-20g.

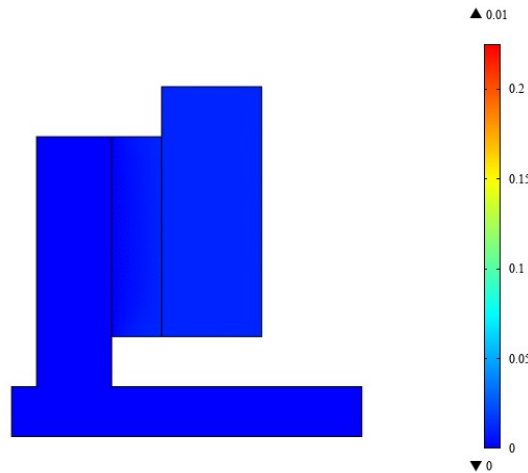

Figure S2. Charge distribution map of finite element simulation under different accelerations of 1g-20g.

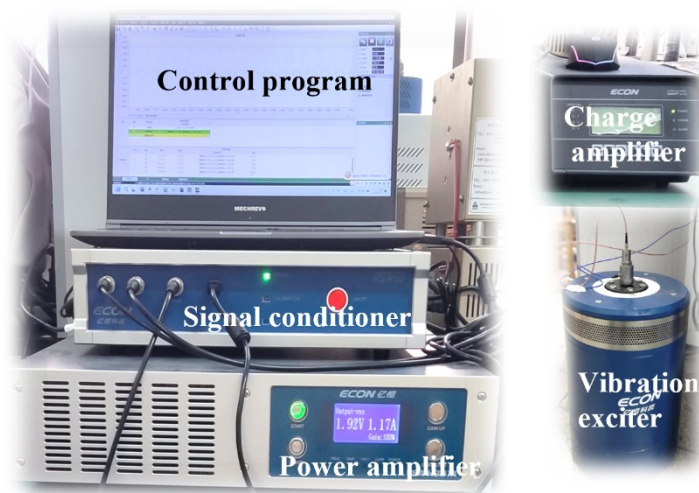

Figure S3. Physical picture of piezoelectric accelerometer testing system.

### References

- [1] ZHANG S, ALBERTA E F, EITEL R E, et al. Elastic, piezoelectric, and dielectric characterization of modified BiScO<sub>3</sub>-PbTiO<sub>3</sub> ceramics [J]. *IEEE transactions on ultrasonics, ferroelectrics, and frequency control*, 2005, 52(11): 2131-2139.
- [2] BOARD I S. *IEEE Standard on Piezoelectricity* [J]. 1996.
- [3] QIAO L, LI G, TAO H, et al. Full characterization for material constants of a promising KNN-based lead-free piezoelectric ceramic [J]. *Ceramics International*, 2020, 46(5): 5641-5644.
